# Supplementary material
Source: HighWire-hosted journal article supplement (https://gh.bmj.com/content/3/2/e000506)
Supplement: inline-supplementary-material-1 [file inline-supplementary-material-1.pdf]

## APPENDIX

**Figure A1: Provider adherence to IMCI guidelines (N=3248 clinical observations)**

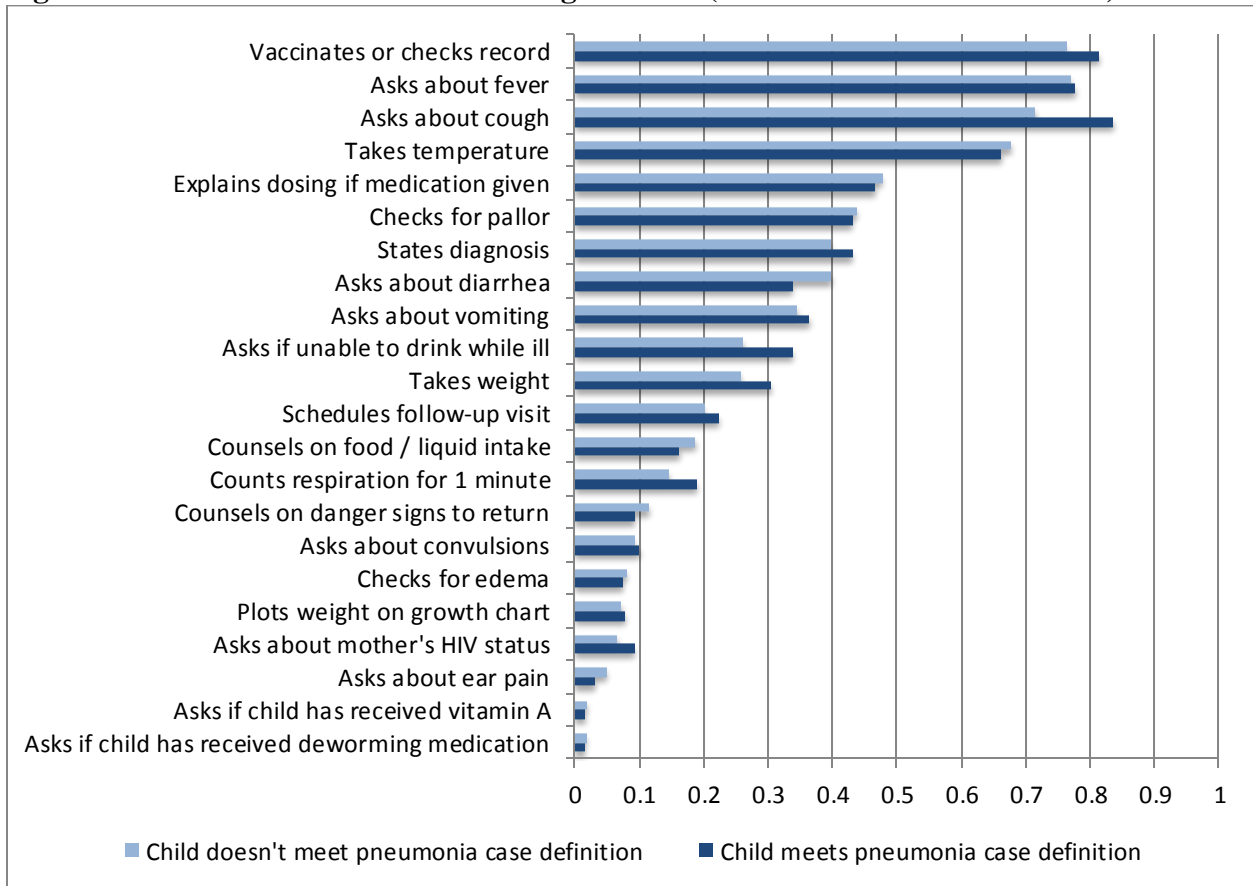

**Table A1: Case mix among children with IMCI-diagnosed pneumonia by facility and clinician qualification (N=573)<sup>1</sup>**

A. Facility type

|                  | Non-hospital | Hospital | Total |
|------------------|--------------|----------|-------|
|                  | N (%)        | N (%)    |       |
| Less severe case | 310 (64)     | 57 (66)  | 367   |
| Severe case      | 176 (36)     | 30 (34)  | 206   |
|                  | 486          | 87       | 573   |

B. Clinician qualification

|                  | Nurse/other | Clinician | Total |
|------------------|-------------|-----------|-------|
|                  | N (%)       | N (%)     |       |
| Less severe case | 74 (64)     | 293 (64)  | 367   |
| Severe case      | 42 (36)     | 164 (36)  | 206   |
|                  | 116         | 457       | 573   |

<sup>1</sup>Case severity defined as child presenting with fever (temperature of 37.5 C or higher) and/or tachypnea (respiratory rate of 60 breaths per minute or higher) determined on re-examination

**Table A2: Recent training on IMCI and supportive supervision among health care workers providing sick child care**

| Health care worker cadre                           | Total providers<br>(N = 808) | Received support<br>N (%) | %   |
|----------------------------------------------------|------------------------------|---------------------------|-----|
| <b>In-service training in IMCI in past 2 years</b> |                              |                           |     |
| Physician (MD or medical officer)                  | 18                           | 1                         | 6   |
| Advanced practice clinician                        | 8                            | 0                         | 0   |
| Paramedical professional                           | 630                          | 98                        | 16  |
| Nurse (RN/RM, PHN/PHM)                             | 7                            | 0                         | 0   |
| Enrolled nurse/midwife                             | 134                          | 14                        | 10  |
| Other nurse/midwife                                | 7                            | 0                         | 0   |
| Other (counselor, social worker)                   | 3                            | 3                         | 100 |
| <b>Supportive supervision in past 6 months</b>     |                              |                           |     |
| Physician (MD or medical officer)                  | 18                           | 5                         | 26  |
| Advanced practice clinician                        | 8                            | 4                         | 52  |
| Paramedical professional                           | 630                          | 380                       | 60  |
| Nurse (RN/RM, PHN/PHM)                             | 7                            | 2                         | 28  |
| Enrolled nurse/midwife                             | 134                          | 85                        | 63  |
| Other nurse/midwife                                | 7                            | 3                         | 43  |
| Other (counselor, social worker)                   | 3                            | 0                         | 0   |
| <b>Both training and supervision</b>               |                              |                           |     |
| Physician (MD or medical officer)                  | 18                           | 1                         | 6   |
| Advanced practice clinician                        | 8                            | 0                         | 0   |
| Paramedical professional                           | 630                          | 69                        | 11  |
| Nurse (RN/RM, PHN/PHM)                             | 7                            | 0                         | 0   |
| Enrolled nurse/midwife                             | 134                          | 10                        | 8   |
| Other nurse/midwife                                | 7                            | 0                         | 0   |
| Other (counselor, social worker)                   | 3                            | 0                         | 0   |

Percents reflect weighted averages
